# Supplementary material
Source: Springer Nature journal article supplement (https://www.springermedizin.de/resource/supplementary/12879_2011_1971_MOESM1_ESM.pdf/9443366)
Supplement: MOESM1 [file 9443366]

Records identified through  
database searching  
(**n = 262**)

Additional records identified  
through other sources  
(**n = 2**)

Records after duplicates removed  
(**n = 245**)

Records screened  
(**n = 245**)

Records excluded (articles  
did not report on RCTs)  
(**n = 229**)

Full-text articles assessed  
for eligibility  
(**n = 15**)

Full-text articles excluded  
(studies not in accordance  
with study protocol)  
(**n = 11**)

Studies included in  
qualitative synthesis  
(**n = 4**)
